# Supplementary material
Source: PubMed Central journal article supplement (PMC3140168)
Supplement: ja2025728_si_001.pdf [file ja2025728_si_001.pdf]

**Structural Basis of Regiospecificity of a Mononuclear Iron Enzyme in  
Antibiotic Fosfomycin Biosynthesis**

**Supplementary Information**

Danny Yun<sup>2</sup>, Mishtu Dey<sup>1,2</sup>, Luke J. Higgins<sup>2,‡</sup>, Feng Yan<sup>4</sup>, Hung-wen Liu<sup>4</sup>, Catherine L.  
Drennan<sup>1, 2, 3,\*</sup>

<sup>1</sup>Howard Hughes Medical Institute. Departments of <sup>2</sup>Chemistry and <sup>3</sup>Biology, Massachusetts Institute of Technology, Cambridge, MA 02139. <sup>4</sup>Division of Medicinal Chemistry, College of Pharmacy, and Department of Chemistry and Biochemistry, University of Texas at Austin, Austin, Texas 78712. <sup>‡</sup>Current Address: Harbor Hospital, 3001 S. Hanover Street, Baltimore, MD 21225

\*Email: [cdrennan@mit.edu](mailto:cdrennan@mit.edu)

**Supplementary Figure 1.** Two dimensional active site contact maps. Distances ( $\text{\AA}$ ) shown with dotted lines and grey spheres are water molecules (a) *R*-HPP, Co(II), monomer A, bidentate binding mode; (b) *R*-HPP, Co(II), monomer B, bidentate; (c) *R*-HPP, Fe(II), monomer A, bidentate; (d) *R*-HPP, Fe(II), monomer B, bidentate; (e) *R*-HPP, Fe(II), monomer C, bidentate; (f) NO-soak, *S*-HPP, Fe(II), monomer A, bidentate, NO; (g) NO-soak, *S*-HPP, Fe(II), monomer B, bidentate, NO; (h) NO-soak, *S*-HPP, Fe(II), monomer C, bidentate, H<sub>2</sub>O; and (i) Fe-*S*-HPP, monomer C, bidentate (1zz8).

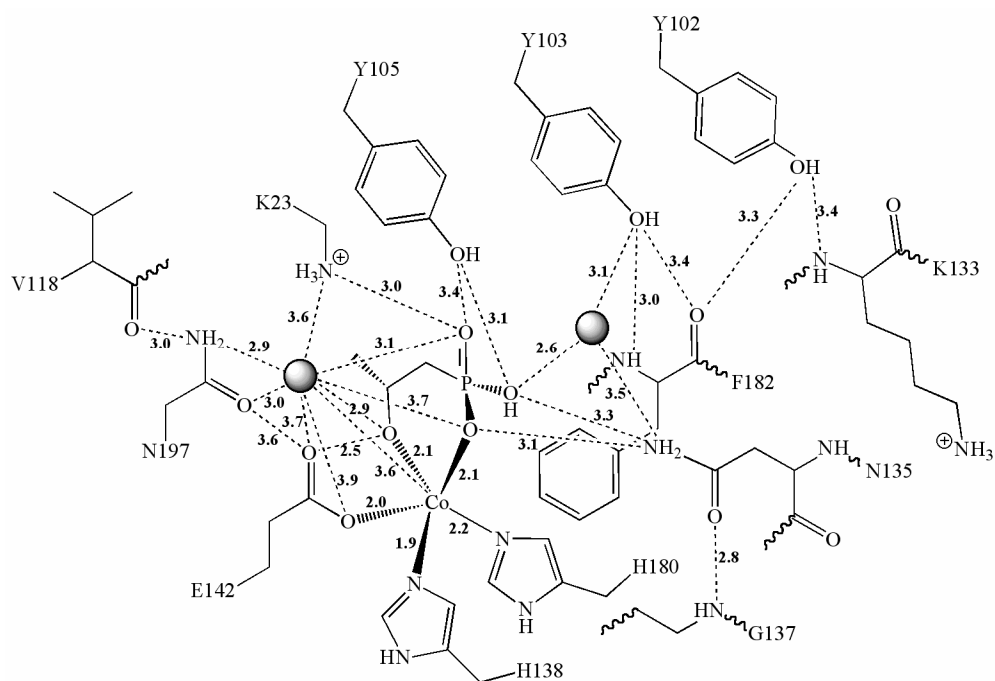

**Supplementary Figure 1a.** *R*-HPP, Co(II), monomer A, bidentate.

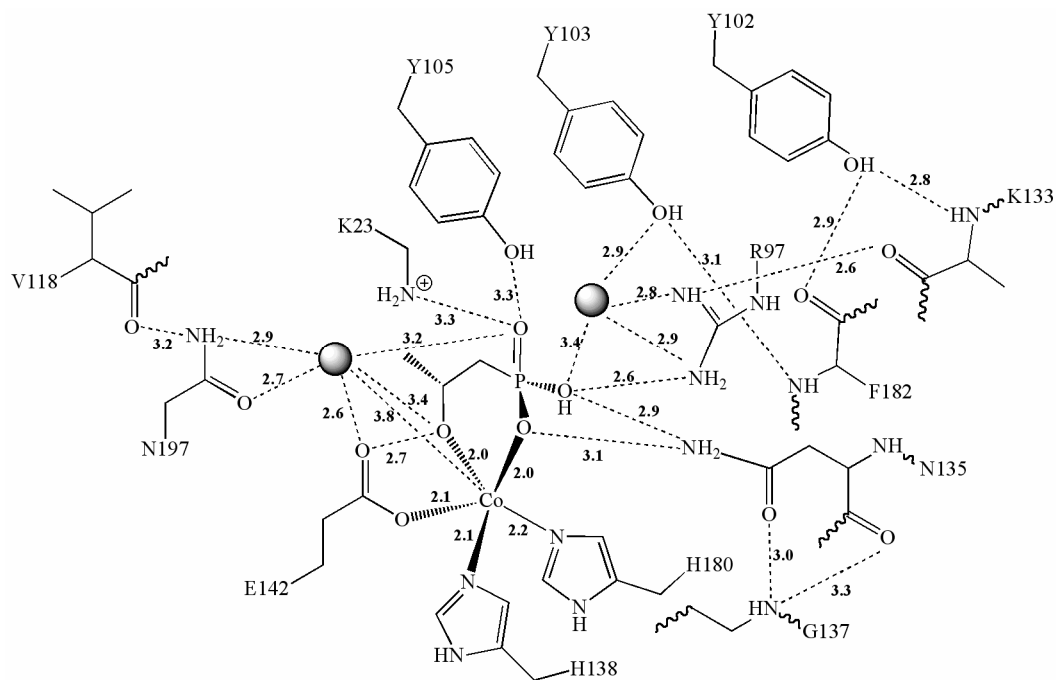

**Supplementary Figure 1b. *R*-HPP, Co(II), monomer B, bidentate.**

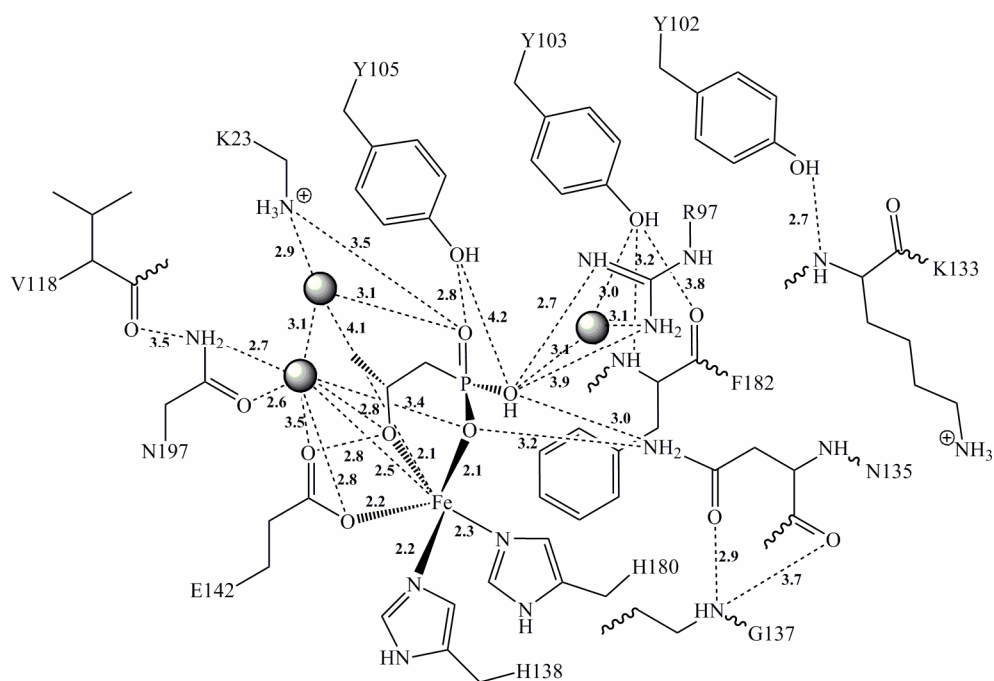

**Supplementary Figure 1c. *R*-HPP, Fe(II), monomer A, bidentate.**



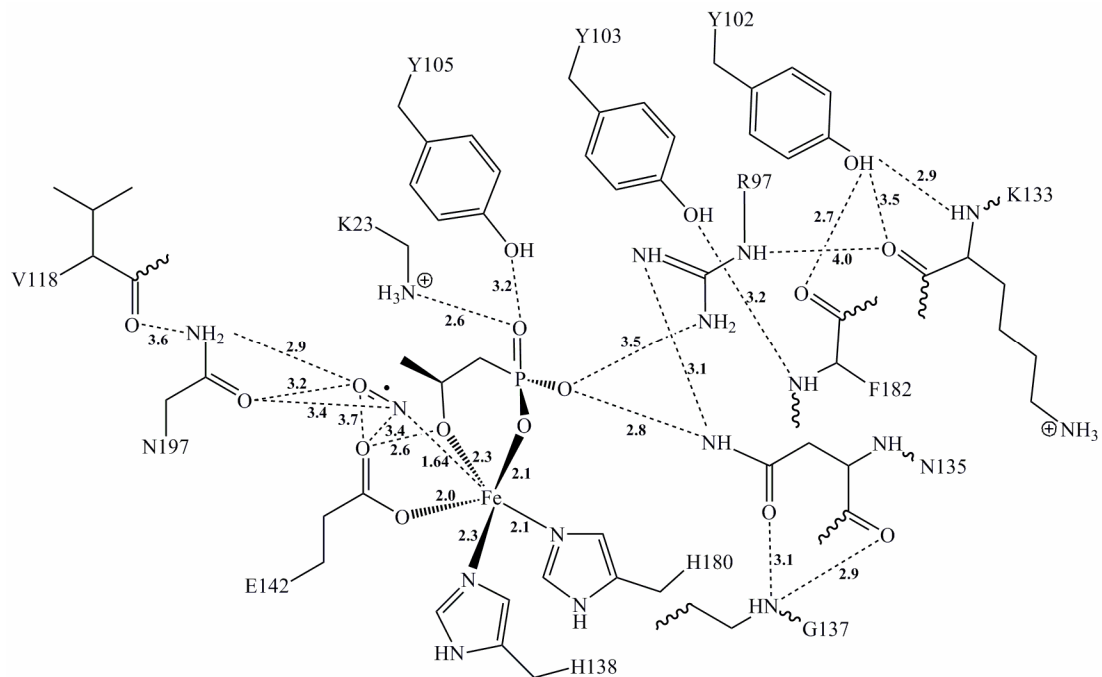

**Supplementary Figure 1f. NO-Soak, S-HPP, Fe(II), monomer A, bidentate, NO.**

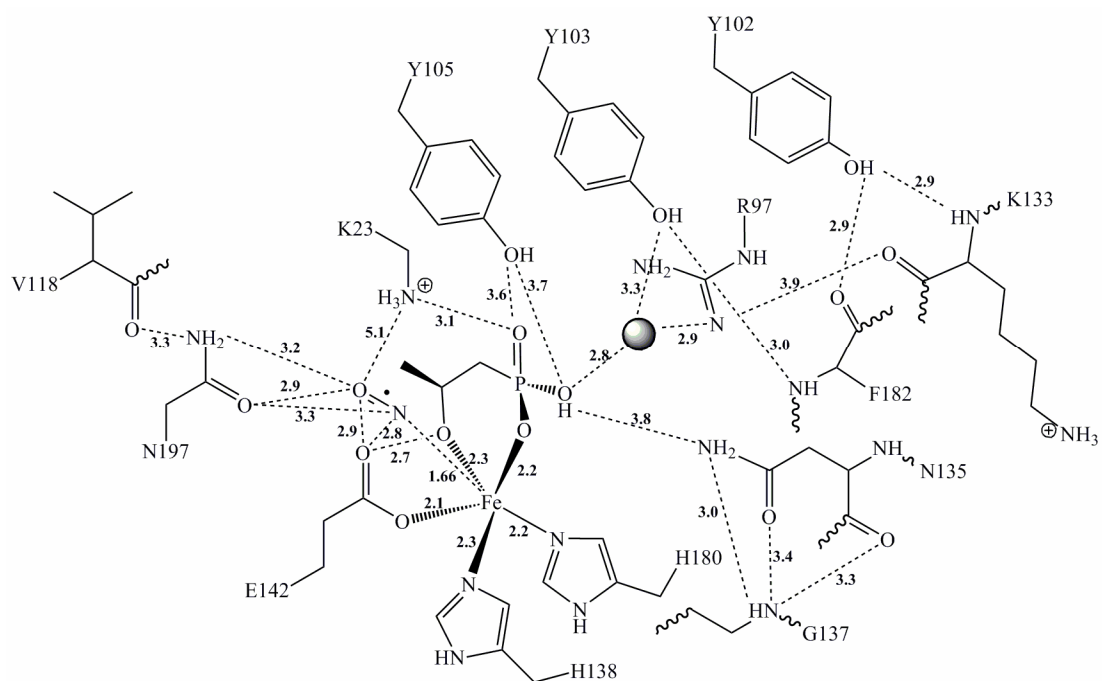

**Supplementary Figure 1g. NO-Soak, S-HPP, Fe(II), monomer B, bidentate, NO.**



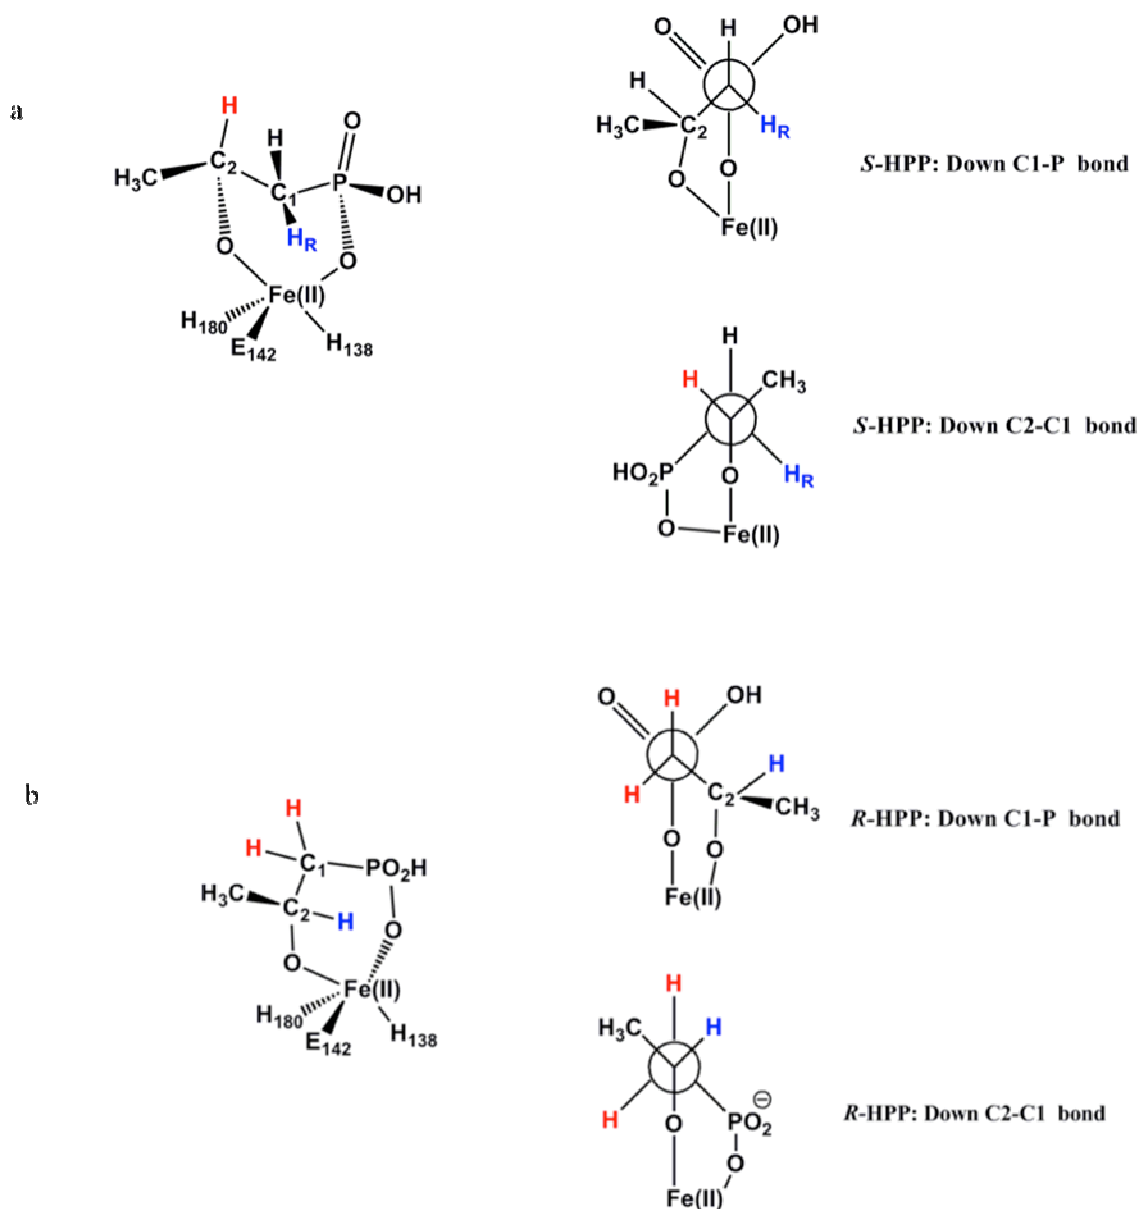

**Supplementary Figure 2.** Newman projections of *S*- and *R*-HPP anchored in a bidentate fashion to iron. The substrates (a) *S*-HPP and (b) *R*-HPP are shown looking down the C1-P bond (top) and C2-C1 bond (bottom) illustrating bidentate substrate binding in a staggered conformation. Hydrogen atoms accessible for abstraction are shown in blue. Hydrogen atoms inaccessible for abstraction are shown in red (See Figure 6).

**Supplementary Table 1. Data Collection and Refinement Statistics**

|                                                                       | <b>R-HPP-<br/>Co(II)</b> | <b>R-HPP-<br/>Fe(II)</b>         | <b>S-HPP-<br/>Fe(II)-NO</b>      |
|-----------------------------------------------------------------------|--------------------------|----------------------------------|----------------------------------|
| <b>Data Collection</b>                                                |                          |                                  |                                  |
| Space Group                                                           | P6 <sub>5</sub> 22       | P4 <sub>2</sub> 2 <sub>1</sub> 2 | P4 <sub>2</sub> 2 <sub>1</sub> 2 |
| Unit Cell Dimensions                                                  |                          |                                  |                                  |
| a, b (Å)                                                              | 86.3                     | 111.6                            | 111.7                            |
| c (Å)                                                                 | 219.1                    | 151.3                            | 152.2                            |
| Beamline                                                              | ALS 5.0.2                | SSRL 9-1                         | APS 24ID-C                       |
| Wavelength (Å)                                                        | 1.1271                   | 1.00                             | 1.00                             |
| Resolution Range (Å)                                                  | 30-2.10<br>(2.18-2.10)   | 50-3.00<br>(3.22-3.00)           | 50-2.85<br>(2.95-2.85)           |
| Observations                                                          | 392445                   | 548792                           | 244234                           |
| Unique Reflections                                                    | 28960                    | 19839                            | 22766                            |
| Redundancy                                                            | 13.6                     | 27.7                             | 10.7                             |
| Completeness (%) <sup>a</sup>                                         | 99.9 (100.0)             | 99.9 (100.0)                     | 99.1 (92.8)                      |
| $I/\sigma(I)$ <sup>a</sup>                                            | 40.2 (5.1)               | 54.5 (11.8)                      | 21.9 (2.3)                       |
| $R_{\text{sym}}$ (%) <sup>a,b</sup>                                   | 6.9 (32.8)               | 8.2 (31.4)                       | 10.1 (43.8)                      |
| Wilson B-Factor (Å <sup>2</sup> )                                     | 35.4                     | 61.9                             | 68.8                             |
| <b>Refinement</b>                                                     |                          |                                  |                                  |
| $R_{\text{work}}$ <sup>c</sup> ( $R_{\text{free}}$ <sup>d</sup> ) (%) | 21.7 (24.5)              | 21.7 (25.5)                      | 24.3 (26.9)                      |
| Resolution Range (Å)                                                  | 30.0-2.10                | 50-3.00                          | 50-2.85                          |
| No. Reflections                                                       | 26908                    | 19766                            | 22379                            |
| No. Molecules per asu <sup>e</sup>                                    | 2                        | 3                                | 3                                |
| No. of non-hydrogen atoms:                                            |                          |                                  |                                  |
| Protein                                                               | 2897                     | 4389                             | 4389                             |
| Cobalt                                                                | 2                        | -                                | -                                |
| Iron                                                                  |                          | 3                                | 3                                |
| R-HPP                                                                 | 16                       | 24                               |                                  |
| S-HPP                                                                 | -                        | -                                | 24                               |
| NO                                                                    | -                        | -                                | 4                                |
| Water                                                                 | 154                      | 49                               | 39                               |
| RMS <sup>f</sup> Deviations:                                          |                          |                                  |                                  |
| Bond Lengths (Å)                                                      | 0.009                    | 0.008                            | 0.009                            |
| Bond Angles (°)                                                       | 1.7                      | 1.6                              | 1.7                              |
| Average B-Factors (Å <sup>2</sup> )                                   |                          |                                  |                                  |
| Protein atoms                                                         | 40.4                     | 56.3                             | 69.1                             |
| Cobalt                                                                | 40.5                     | -                                | -                                |
| Iron                                                                  |                          | 55.0                             | 68.8                             |
| R-HPP                                                                 | 49.3                     | 58.4                             |                                  |
| S-HPP                                                                 |                          |                                  | 73.5                             |
| NO                                                                    |                          |                                  | 72.7                             |
| Water                                                                 | 41.7                     | 42.3                             | 53.6                             |



<sup>a</sup>Values in parentheses are the highest resolution shell. <sup>b</sup> $R_{sym} = \frac{\sum_{hkl} \sum_i |I_i(hkl) - \langle I(hkl) \rangle|}{\sum_{hkl} \sum_i I_i(hkl)}$ , where  $I_i(hkl)$  is the  $i^{\text{th}}$  measured diffraction intensity and  $\langle I(hkl) \rangle$  is the mean intensity for the reflection with the miller index (hkl). <sup>c</sup> $R_{work} = \frac{\sum_{hkl} |F_o(hkl) - F_c(hkl)|}{\sum_{hkl} |F_o(hkl)|}$ . <sup>d</sup> $R_{free} = R_{work}$  for 5% of reflections omitted from refinement. <sup>e</sup>asu, asymmetric unit. <sup>f</sup>RMS, root mean square.

**Supplementary Table 2. Structures in paper**

| <b>Data set</b> | <b>Substrate</b> | <b>Metal</b> | <b>Monomer ID</b> | <b>Substrate Conformation</b> | <b>Other ligand</b> | <b>Figure*</b> |
|-----------------|------------------|--------------|-------------------|-------------------------------|---------------------|----------------|
|                 | <i>R</i> -HPP    | Co(II)       | Monomer A         | Bidentate                     |                     | S1a            |
|                 | <i>R</i> -HPP    | Co(II)       | Monomer B         | Bidentate                     |                     | 2a, S1b        |
|                 | <i>R</i> -HPP    | Fe(II)       | Monomer A         | Bidentate                     |                     | S1c            |
|                 | <i>R</i> -HPP    | Fe(II)       | Monomer B         | Bidentate                     |                     | S1d            |
|                 | <i>R</i> -HPP    | Fe(II)       | Monomer C         | Bidentate                     |                     | 2b, S1e        |
| “NO”            | <i>S</i> -HPP    | Fe(II)       | Monomer A         | Bidentate                     | NO                  | S1f            |
| “NO”            | <i>S</i> -HPP    | Fe(II)       | Monomer B         | Bidentate                     | NO                  | S1g            |
| “NO”            | <i>S</i> -HPP    | Fe(II)       | Monomer C         | Bidentate                     | --                  | S1h            |
| 1ZZ8            | <i>S</i> -HPP    | Fe(II)       | Monomer C         | Bidentate                     |                     | 2d, S1i        |

\*-Figure 2c 1ZZB monomer B, Figure 2d 1ZZ8 monomer C.
